# Supplementary material
Source: PubMed Central journal article supplement (PMC5082712)

### A Xvelo - WT

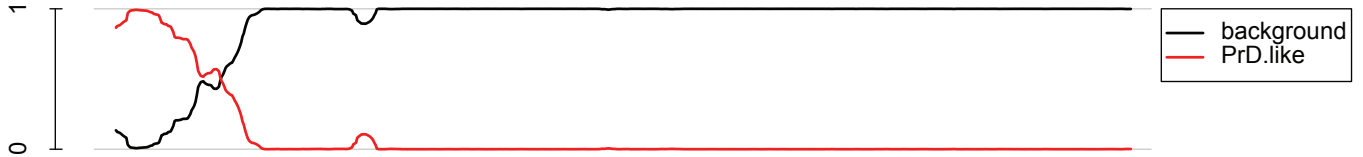

MAP  
Vit 0 100 200 300 400 500 600 700 **PAPA: 0.33**

1 MNTTAPPPENGQYSTNQPRR**YFYA**QPTAQLPFQNPWYLGQLYNPYCIPGPGFRGGN**YFPHY**SVALHEYPGYFVFPQPMNTRMSRRPHFNPHPPSPMFYH  
 101 ATRFRHYSSPGRRTETKETQTDPRQECASKKQHSSDGKGCDDGNVVLSSGISSTGNESNLENVEMSMSPATSTQERDFHKNACNSAQYRNMPPGSYAY  
 201 EKEEVRIEYSGSPAAIQMWKSYKETIPIYDVAVVKELPENNVQRDLFCGVLYGPHAEGEELAVQSVAFSNKDECKNSLPPKLCIDAVQETETQTTIVQ  
 301 TREPRYETSQOGKQVMVKATMEAESPTMVTEHVEVSPVYDDPQVSVPEDESDEHNLI TNGDLIEGSDGCEQODIANQSTCNGEVKLANKNMWTDDSI  
 401 EKFMPSPTWLACFENIDANYDYDVYSSQRKQKQTSVLSITSEELSSRDEGSSLDSASVSYPVDYILRKGLYTFRKTTEDELEKETIKSSGSLKEDDIPLK  
 501 QSCNKYVKYRSSAVKAKDVSSRCRKIGVPLKGLSRRKLYSVKKNPKKSQSLSEPEDSDEYVWMEENNEEGDEDDSEEEYFQESLPHGQVDIGKGS  
 601 IFKQIAQKRILWKPPKGMVPAQIVGWVPEKLVTKKAYDALNQVCRDKDYDGSYTYDKKISKLNRFI SEPKKSMQKSVGGKAQKTPGTAVEEYVW  
 701 GRGAKPKFPEPAYLQDPTKIKEQDKPPKKKALKSSKRKQTRTDPPEVETWEVPRSFYLRGHGLQKRGTKKKQLNGKL

### B Xvelo - 4D

MAP  
Vit **PAPA: -0.04**

1 MNTTAPPPENGQYSTNQPRR**YFYA**QPTAQLPFQNPWYLGQLYNPYCIPGPGFRGGN**DDPDD**SVALHEYPGYFVFPQPMNTRMSRRPHFNPHPPSPMFYH

### C Xvelo - 7D

MAP  
Vit **PAPA: -0.06**

1 MNTTAPPPENGQYSTNQPRR**DDD**AQPTAQLPFQNPWYLGQLYNPYCIPGPGFRGGN**DDPDD**SVALHEYPGYFVFPQPMNTRMSRRPHFNPHPPSPMFYH

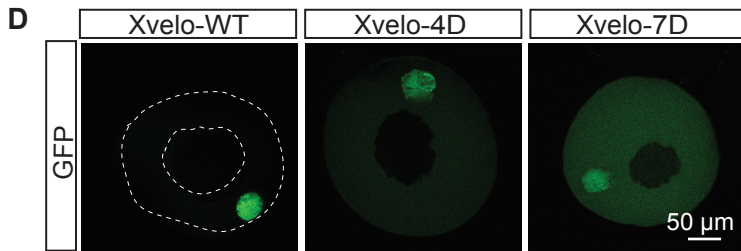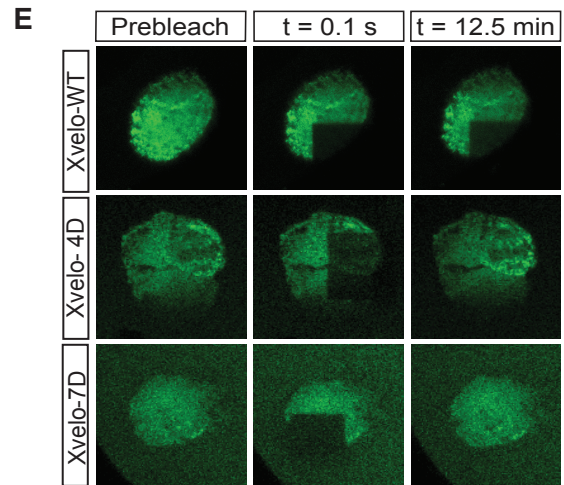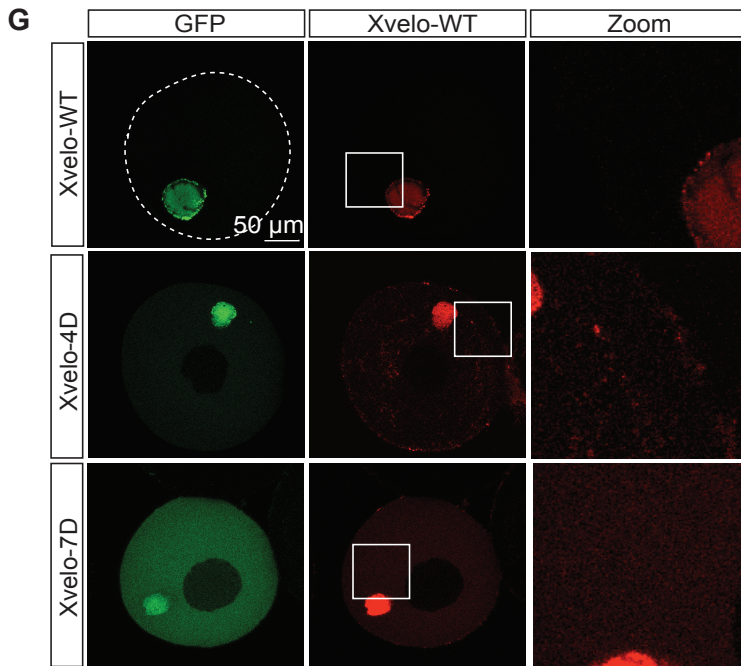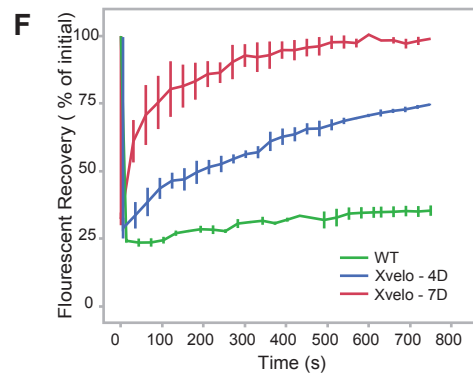

Supplement: NIHMS803877-supplement-3.pdf [file NIHMS803877-supplement-3.pdf]
