# Supplementary material
Source: PubMed Central journal article supplement (PMC5082712)

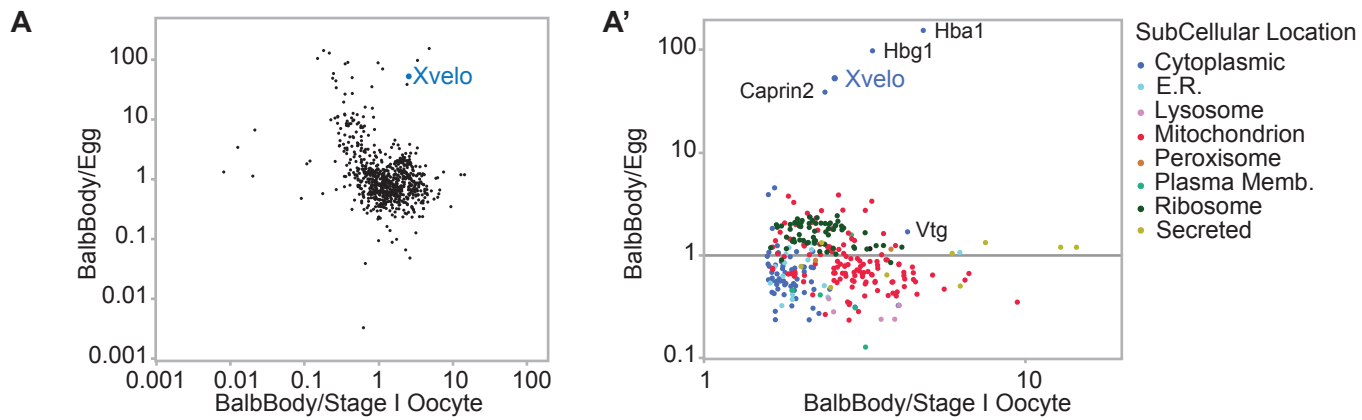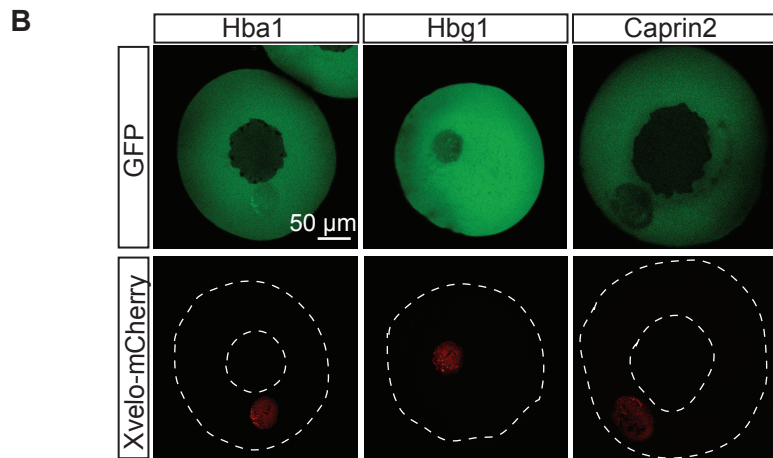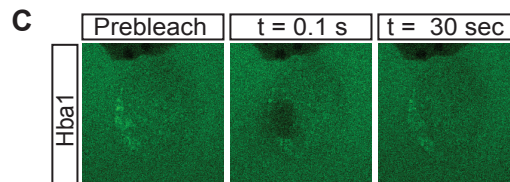

Supplement: NIHMS803877-supplement-1.pdf [file NIHMS803877-supplement-1.pdf]

**A**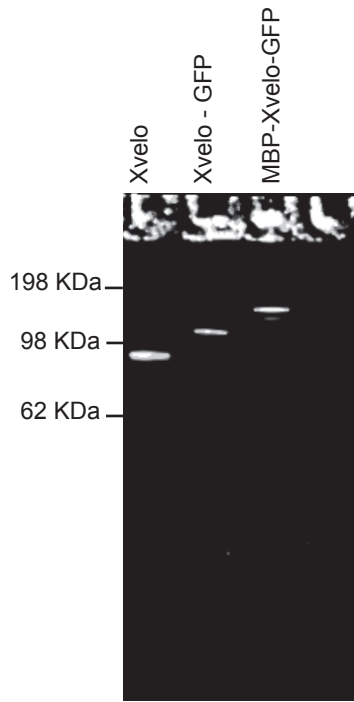**B**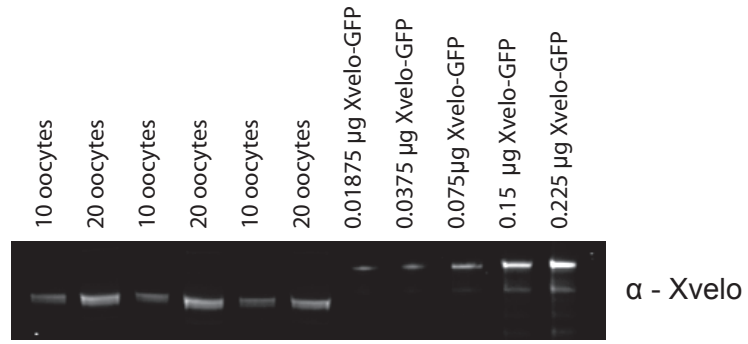**C**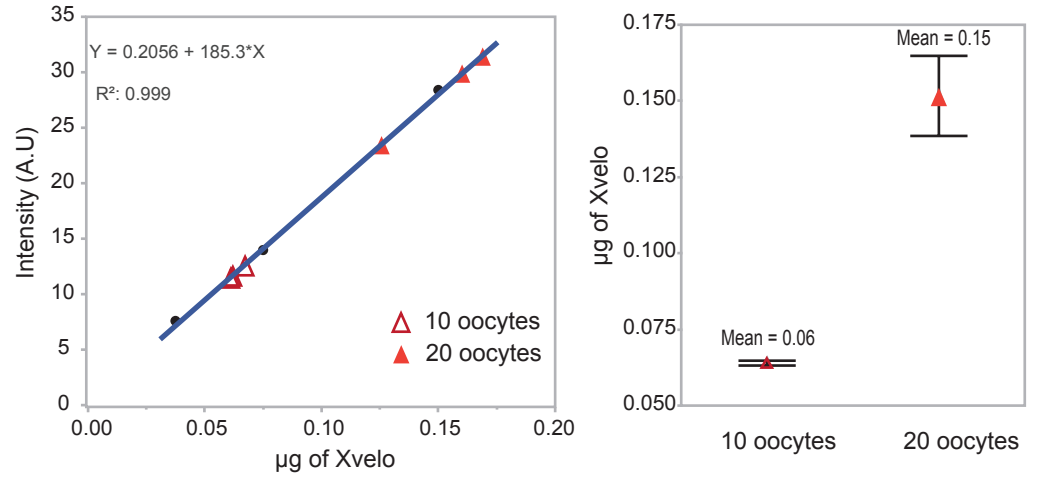**D**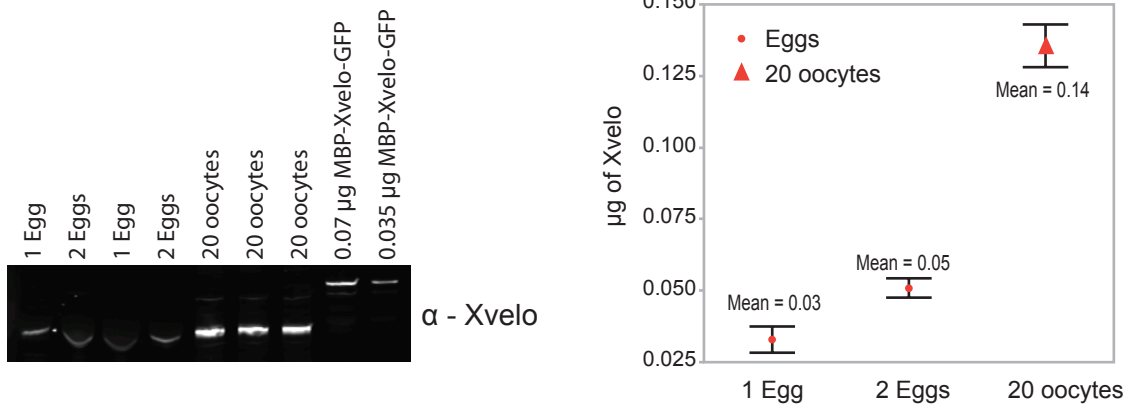

Supplement: NIHMS803877-supplement-2.pdf [file NIHMS803877-supplement-2.pdf]

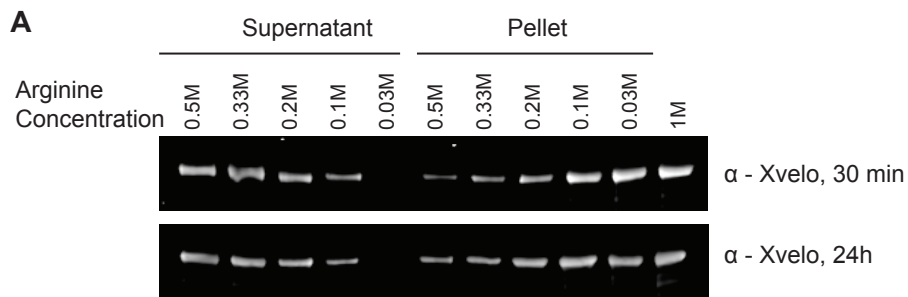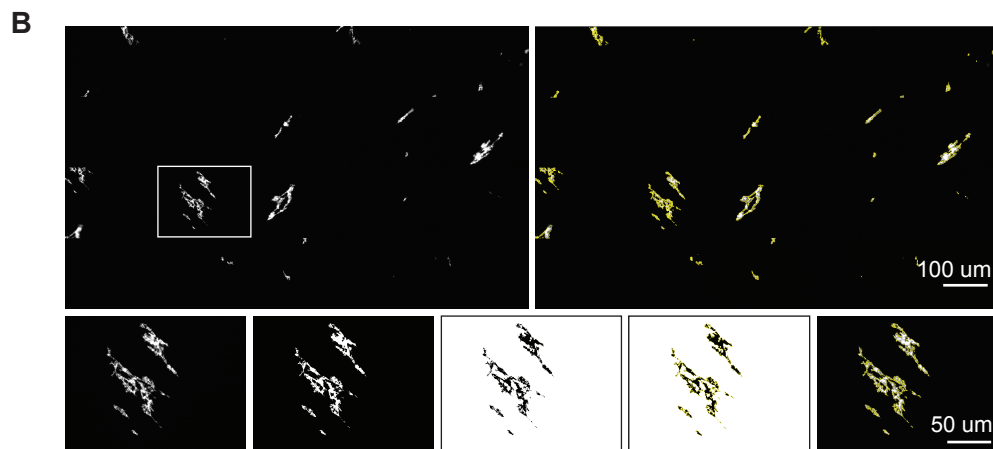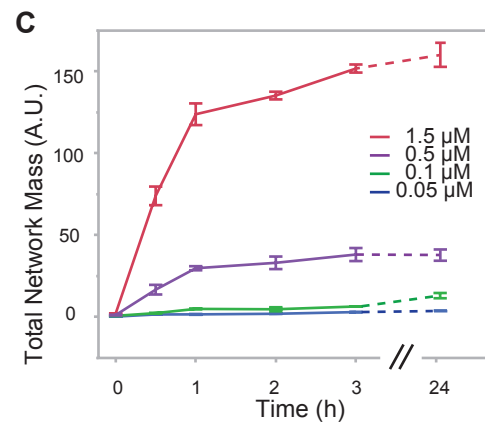

Supplement: NIHMS803877-supplement-4.pdf [file NIHMS803877-supplement-4.pdf]

**A**

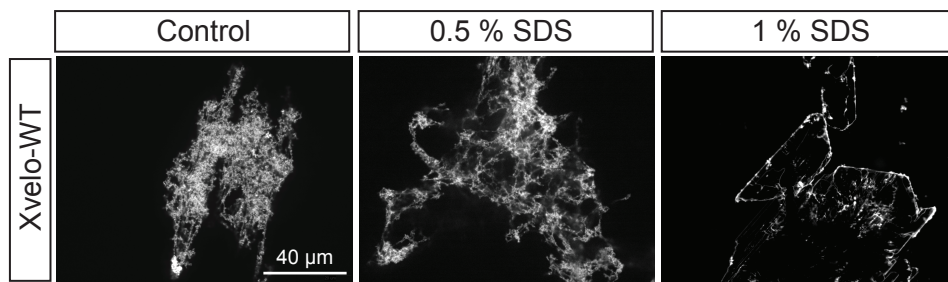

Supplement: NIHMS803877-supplement-5.pdf [file NIHMS803877-supplement-5.pdf]

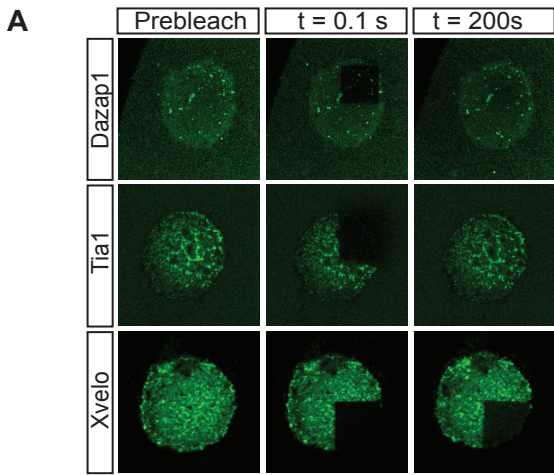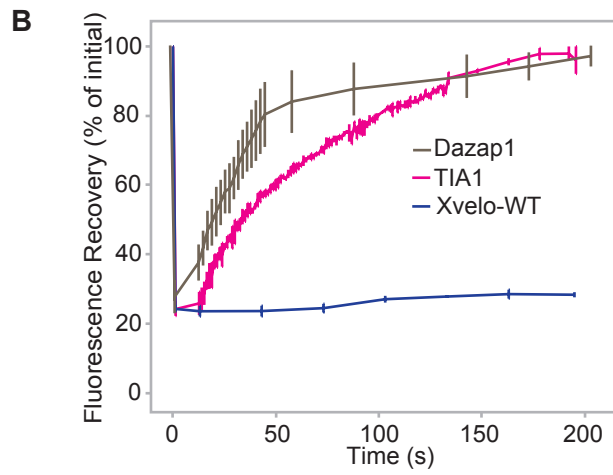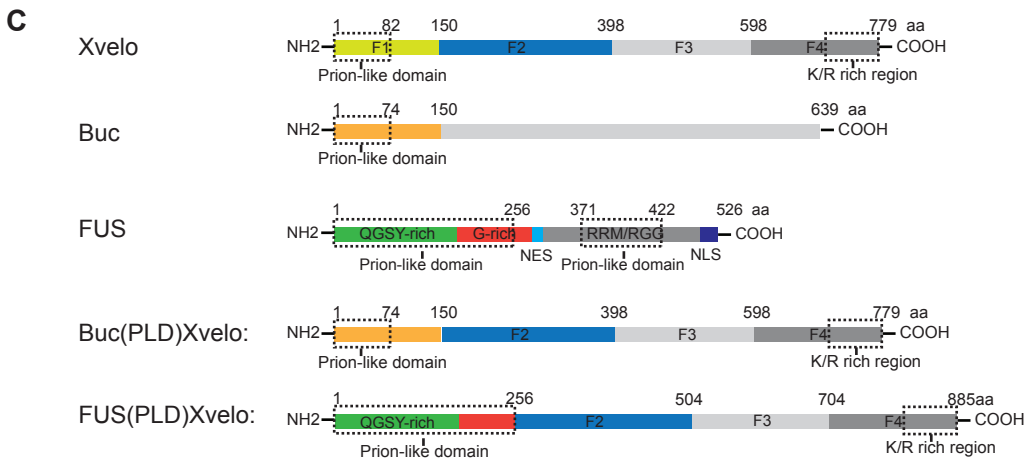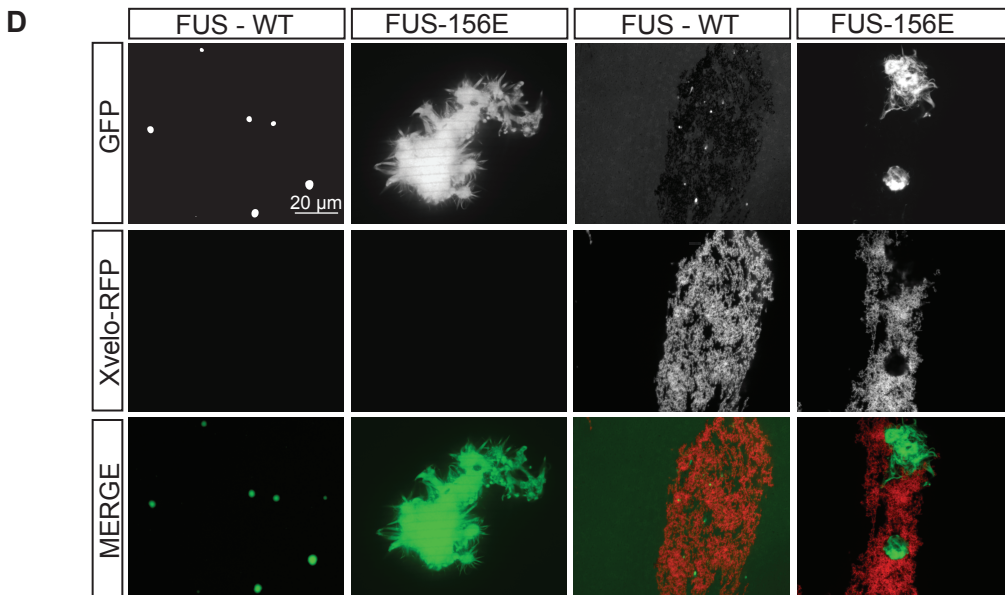

Supplement: NIHMS803877-supplement-6.pdf [file NIHMS803877-supplement-6.pdf]

A

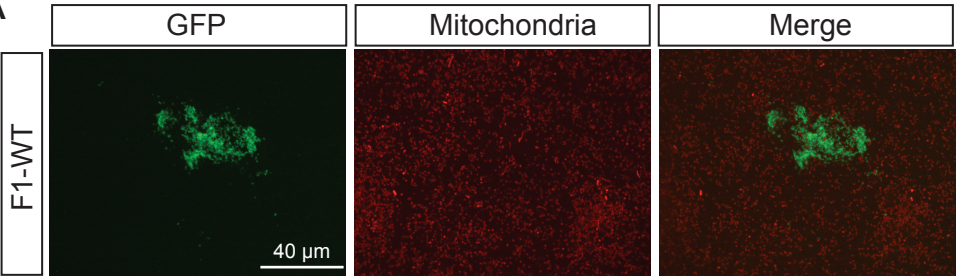

Supplement: NIHMS803877-supplement-7.pdf [file NIHMS803877-supplement-7.pdf]
